# Supplementary material
Source: PubMed Central journal article supplement (PMC7003248)
Supplement: es9b05040_si_001.pdf [file es9b05040_si_001.pdf]

**Advances in distinguishing groundwater influenced by Oil Sands Process-affected Water (OSPW) from natural bitumen-influenced groundwaters.**

L. Mark Hewitt<sup>a\*</sup>, James W. Roy<sup>a</sup>, Steve J. Rowland<sup>b</sup>, Greg Bickerton<sup>a</sup>, Amila DeSilva<sup>a</sup>, John V. Headley<sup>c</sup>, Craig B. Milestone<sup>d</sup>, Alan G. Scarlett<sup>b</sup>, Susan Brown<sup>a</sup>, Christine Spencer<sup>a</sup>, Charles E. West<sup>b#</sup>, Kerry M. Peru<sup>c</sup>, Lee Grapentine<sup>a</sup>, Jason M.E. Ahad<sup>e</sup>, Hooshang Pakdel<sup>f</sup> and Richard A. Frank<sup>a</sup>

<sup>a</sup>Water Science and Technology Directorate, Environment and Climate Change Canada, 867 Lakeshore Road, Burlington, ON, Canada L7R 4A6

<sup>b</sup>Petroleum and Environmental Geochemistry Group, Biogeochemistry Research Centre, University of Plymouth, Drake Circus, 5 Plymouth PL4 8AA, U.K

<sup>c</sup>Water Science and Technology Directorate, Environment and Climate Change Canada, 11 Innovation Boulevard, Saskatoon, SK, Canada, S7N3H5

<sup>d</sup>School of Chemical and Environmental Sciences, Davis Campus, Sheridan College, 7899 McLaughlin Road Brampton, ON, Canada, L6Y 5H9

<sup>e</sup>Geological Survey of Canada, Natural Resources Canada, Québec, QC, G1K 9A9, Canada

<sup>f</sup>INRS – Eau Terre Environnement, Québec, QC, G1K 9A9, Canada

# Present Address: EXPEC Advanced Research Center, Saudi Aramco, Dhahran 31311, Saudi Arabia

**\*Corresponding Author:** L. Mark Hewitt  
WSTD, Environment Canada  
867 Lakeshore Road, Burlington, ON, Canada L7R 4A6  
Phone: (905)319-6924 / Fax: (905)336-6430  
Email: [mark.hewitt@canada.ca](mailto:mark.hewitt@canada.ca)

## Supporting Information

### Photos of Field Work

Figure S1 – Photos of shallow groundwater sampling at the edge of the Athabasca River, adjacent to Tar Island Dyke (Pond 1), using the mini-profiler system.

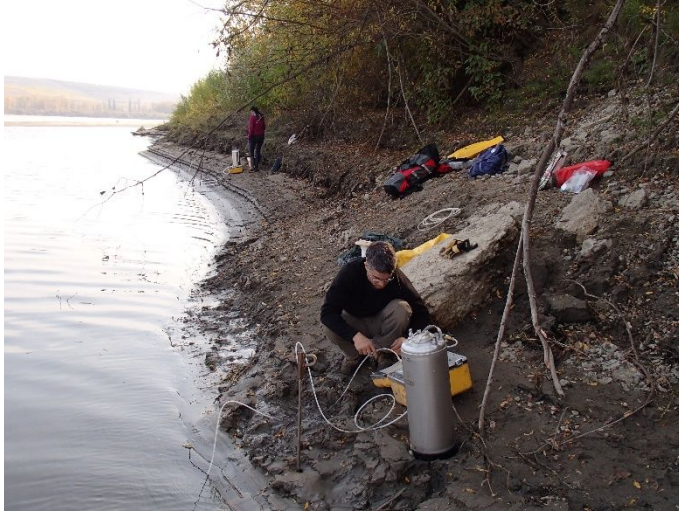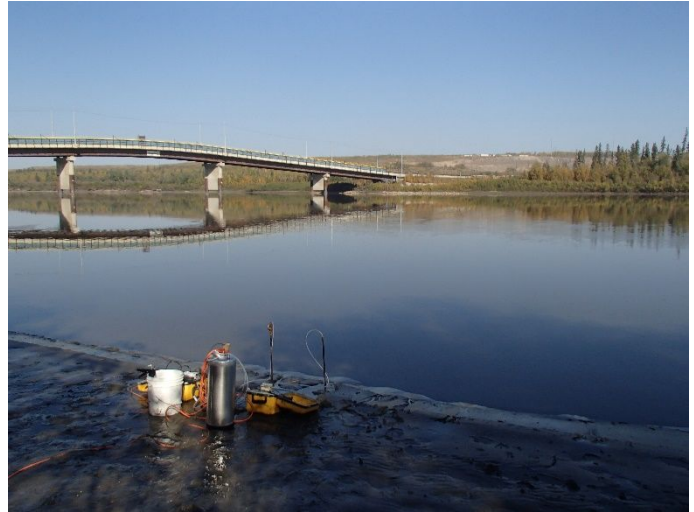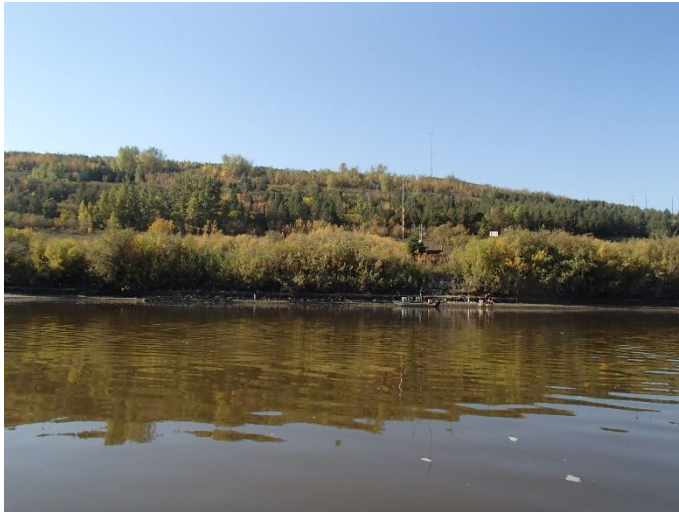



Figure S2 – Photos of shallow groundwater sampling at the edge of the Athabasca River or one of its tributaries away from any tailings pond (i.e., background samples) using the mini-profiler system.

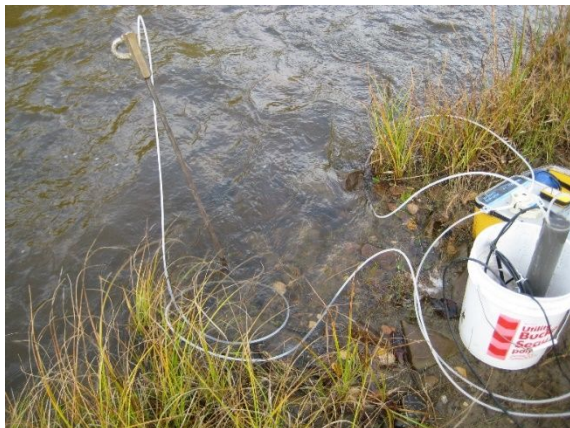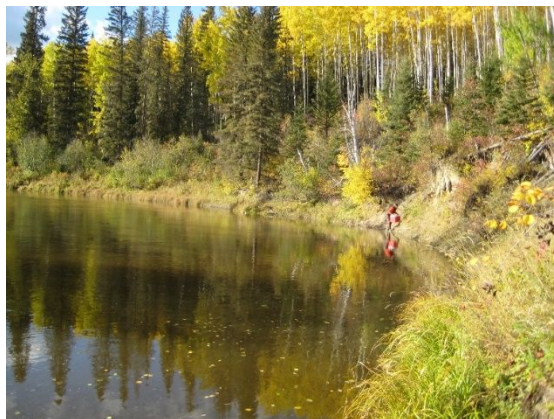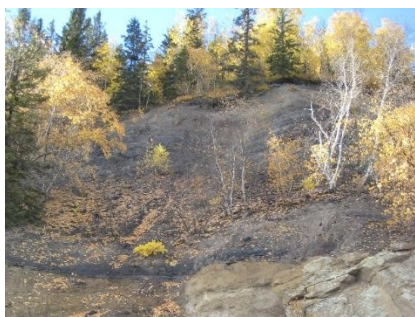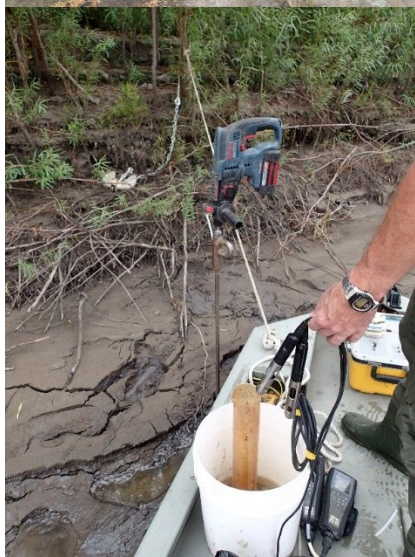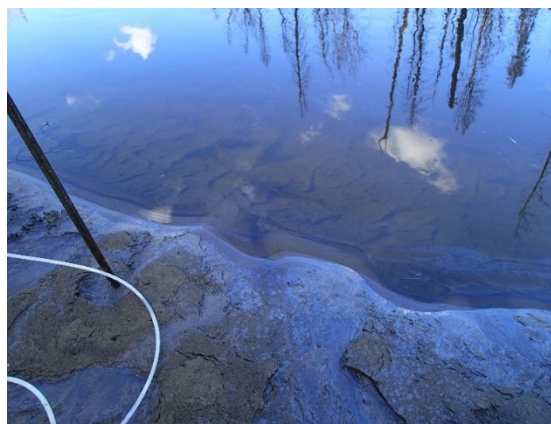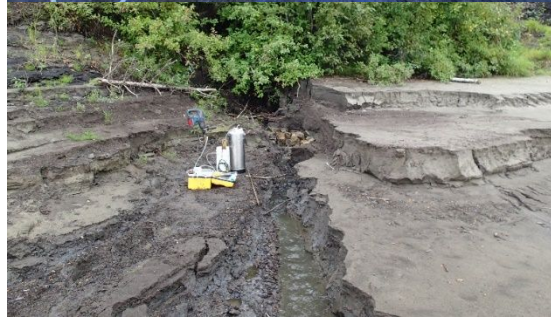

Figure S3 – Photo showing small globules of bitumen extracted with shallow groundwater using the mini-profiler, collected in a plastic volumetric flask, which occurred at several of the background sites.

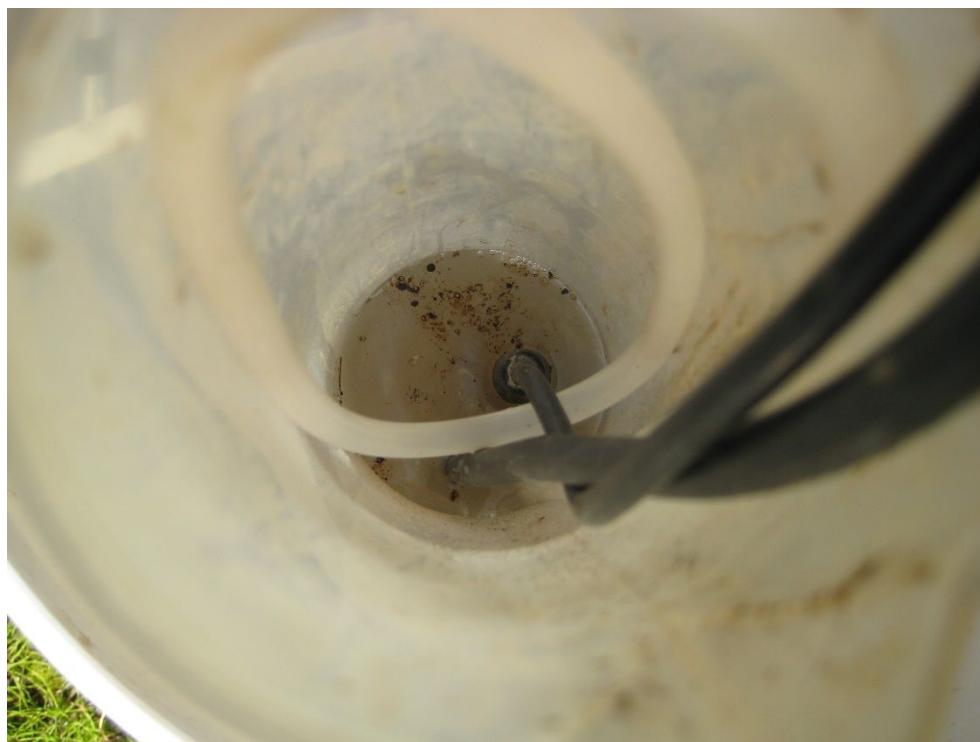

**Table S1.** Details on sample collection; those with similar collection details are grouped.

| Collected Sample                                                                      | Container   | Preservation                                 |
|---------------------------------------------------------------------------------------|-------------|----------------------------------------------|
| Major anions (chloride, nitrate, nitrite, sulphate, phosphate); Artificial Sweeteners | 30mL HDPE   | Filtered (0.45 µm)                           |
| Major cations; metals (+ metalloids)                                                  | 250 mL HDPE | filtered; pH <2, with 10% nitric acid        |
| Ammonium                                                                              | 30mL HDPE   | filtered; pH 5-6, with 10% hydrochloric acid |

### PFAS Analysis

Briefly, 300 ml to 500 ml samples of groundwater were spiked with 30 µL of 6 to 15 ng ml<sup>-1</sup> methanolic mixture of isotopically labeled surrogates (to track extraction efficiency) and adjusted to pH 3 using formic acid. After conditioning 150 mg SPE (OASIS WAX, Waters) using methanol and SPE-polished water, samples were loaded at a rate of 1 ml min<sup>-1</sup>. PFAS were eluted using 5 ml of 1% ammonia in methanol and concentrated to just dryness using a gentle stream of nitrogen gas. Residue was reconstituted in 0.5 ml of 1:1 water/methanol and spiked with 30 µL of a separate isotopically labeled standard cocktail (6 to 15 ng ml<sup>-1</sup>) to monitor for matrix effects. PFAS analysis was by ultrahigh performance liquid chromatography tandem mass spectrometry (UHPLC-MS/MS, Waters XEVO TQS system) operated in negative electrospray ionization mode using previously reported instrumental parameters<sup>50</sup> with further details provided (Tables S2-4). OSPW samples were processed using analogous methods but using 50 ml sample extractions due to the high concentrations. Each analyte was quantified using relative response to its corresponding isotopically labeled standard via a 15-level calibration curve ranging from 0.003-0.002 ng ml<sup>-1</sup> to 25 -30 ng ml<sup>-1</sup>. Method blanks were processed alongside samples to ascertain background contamination and spike and recovery experiments were conducted to determine extraction efficiency and matrix effects. All PFAS were below detection limits (<LOD) in method blanks with the exception of perfluorooctanoate which ranged from 0.011 to 0.020 ng ml<sup>-1</sup> in the final 0.5 ml extract.

Extraction efficiency (EE) was calculated using:

$$EE = \frac{A_{pre - extraction\ surrogate}}{A_{post - extraction\ surrogate}} \times 100\%$$

Where  $A_{pre-extraction}$  is the peak area of the surrogate that was spiked into the sample before extraction (for example  $^{13}\text{C}_{1,2,3,4}$ -PFOS) and  $A_{post-extraction}$  is the peak area of the surrogate that was spiked into the sample after extraction (i.e.  $^{13}\text{C}_{1,2,3,4,5,6,7,8}$ -PFOS) just before instrumental analysis. The measure of extraction efficiency provides an indication of the extraction recovery without influence of the matrix enhancement or suppression since both numerator and denominator contain the same matrix. An ideal extraction method produces EE close to 100%.

Matrix Recovery (MR) was calculated using:

$$MR = \frac{A_{post-extraction\ surrogate}}{A_{calibration\ standard}} \times 100\%$$

Where  $A_{post-extraction}$  is the peak area of the surrogate that was spiked into the sample after extraction (i.e.  $^{13}\text{C}_{1,2,3,4,5,6,7,8}$ -PFOS) just before instrumental analysis and  $A_{calibration\ standard}$  is the peak area of the same surrogate at equivalent concentration in solvent only (no matrix). The measure of matrix surrogate recovery provides an indication of the matrix effect without influence of analyte recovery because surrogate in the numerator was spiked into the matrix after extraction. When  $MR < 100\%$ , matrix suppression is occurring and  $> 100\%$  suggests matrix enhancement of the analyte signal. An ideal extraction method produces MR close to 100%.

**Table S2.** Average  $\pm$  standard error recovery (%) of isotopically labeled standards in samples using peak area. Extraction efficiency is calculated using the surrogate spiked prior to extraction and compared to the surrogate spiked post-extraction. Matrix effects were evaluated by comparing the recovery of the surrogate added to the extract to a solvent standard.

| Extraction efficiency (%), based on surrogate spiked to sample before extraction |                              | Recovery of Matrix spike (post-extraction) (%) |                                |
|----------------------------------------------------------------------------------|------------------------------|------------------------------------------------|--------------------------------|
| $^{13}\text{C}_{1,2,3,4}$ -PFOS                                                  | $^{18}\text{O}_{1,2}$ -PFHxS | $^{13}\text{C}_{1,2,3,4,5,6,7,8}$ -PFOS        | $^{13}\text{C}_{1,2,3}$ -PFHxS |
| 86 $\pm$ 5.0                                                                     | 87 $\pm$ 4.3                 | 99 $\pm$ 1.2                                   | 98 $\pm$ 2.6                   |

**Table S3.** Limit of quantitation (LOQ) for PFAS in OSPW and groundwater. Instrument detection limits are based on concentration corresponding to signal to noise of 5 using solvent standard. Matrix-specific limits of quantitation are in units of ng/L corresponding to sample extraction volume (500 ml groundwater and 0.5 ml extract; 50 ml OSPW and 0.5 ml extract). \*LOQ for PFOA in OSPW and groundwater is based on average PFOA concentration in blanks (0.0155 ng/ml).

| Analyte | Instrument detection limits (ng/ml) | LOQ in OSPW (ng/L) | LOQ in groundwater (ng/L) |
|---------|-------------------------------------|--------------------|---------------------------|
| PFHxA   | 0.002                               | 0.02               | 0.002                     |
| PFHpA   | 0.003                               | 0.03               | 0.003                     |
| PFOA    | 0.004                               | 0.15*              | 0.016*                    |
| PFNA    | 0.004                               | 0.04               | 0.004                     |
| PFDA    | 0.004                               | 0.04               | 0.004                     |
| PFUnDA  | 0.004                               | 0.04               | 0.004                     |
| PFDoA   | 0.004                               | 0.04               | 0.004                     |
| PFBS    | 0.003                               | 0.03               | 0.003                     |
| PFHxS   | 0.002                               | 0.02               | 0.002                     |
| PFOS    | 0.002                               | 0.02               | 0.002                     |

**Table S4.** Instrument parameters for PFAS analysis

| <b>Liquid Chromatograph</b> |                                                                                                                                                          |                                       |           |           |
|-----------------------------|----------------------------------------------------------------------------------------------------------------------------------------------------------|---------------------------------------|-----------|-----------|
| Instrument name             | Acquity UPLC I class (Waters Corporation)                                                                                                                |                                       |           |           |
| Injection volume            | 2 $\mu$ L                                                                                                                                                |                                       |           |           |
| Column                      | BEH C-18, 2.1 x 100 mm, 1.7 $\mu$ m                                                                                                                      |                                       |           |           |
| Column temperature          | 40 $^{\circ}$ C                                                                                                                                          |                                       |           |           |
| Mobile Phase                | A: 0.1 mM ammonium acetate (>98%, Sigma Aldrich) in SPE-cleaned water (Optima Grade, Fisher Scientific)<br>B: methanol (Optima Grade, Fisher Scientific) |                                       |           |           |
| Gradient elution            | <b>Time (min)</b>                                                                                                                                        | <b>Flow Rate, ml min<sup>-1</sup></b> | <b>%A</b> | <b>%B</b> |
|                             | 0                                                                                                                                                        | 0.4                                   | 75        | 25        |
|                             | 0.5                                                                                                                                                      | 0.4                                   | 75        | 25        |
|                             | 5.0                                                                                                                                                      | 0.4                                   | 15        | 85        |
|                             | 5.1                                                                                                                                                      | 0.4                                   | 0         | 100       |
|                             | 5.6                                                                                                                                                      | 0.4                                   | 0         | 100       |
|                             | 7.0                                                                                                                                                      | 0.55                                  | 0         | 100       |
|                             | 9.0                                                                                                                                                      | 0.4                                   | 75        | 25        |
|                             | 13.0                                                                                                                                                     | 0.4                                   | 75        | 25        |

| <b>Mass spectrometer</b>                         |                                    |          |                      |
|--------------------------------------------------|------------------------------------|----------|----------------------|
| Instrument name                                  | XEVO TQ-S (Waters Corporation)     |          |                      |
| Ionization mode                                  | Electrospray negative ionization   |          |                      |
| Detection mode                                   | Multiple reaction monitoring (MRM) |          |                      |
| Source temperature                               | 150 $^{\circ}$ C                   |          |                      |
| Capillary voltage                                | 0.6 kV                             |          |                      |
| Desolvation gas temperature                      | 450 $^{\circ}$ C                   |          |                      |
| Collision gas flow rate                          | 800 L hr <sup>-1</sup>             |          |                      |
| <b>MRM precursor to product ion transitions:</b> |                                    |          |                      |
| Analyte                                          | MRM (m/z)                          | Cone (V) | Collision Energy (V) |
| PFHxA                                            | 313 $\rightarrow$ 269, 119         | 16       | 10, 17               |
| PFHpA                                            | 363 $\rightarrow$ 319, 169         | 16       | 10, 18               |
| PFOA                                             | 413 $\rightarrow$ 369, 169         | 16       | 11, 18               |
| PFNA                                             | 463 $\rightarrow$ 419, 219         | 10       | 10, 17               |
| PFDA                                             | 513 $\rightarrow$ 469, 219         | 10       | 10, 17               |
| PFUnDA                                           | 563 $\rightarrow$ 519, 269         | 10       | 10, 17               |
| PFDoA                                            | 613 $\rightarrow$ 569, 169         | 8        | 12, 28               |
| PFBS                                             | 299 $\rightarrow$ 99, 80           | 6        | 30, 30               |
| PFHxS                                            | 399 $\rightarrow$ 99, 80           | 6        | 32, 32               |
| PFOS                                             | 499 $\rightarrow$ 99, 80           | 2        | 36, 40               |



**Table S5.** Tests for equality between Background GW and OSPW groups.  
Median tests done on untransformed values; t-tests on transformed values [ $\log(x+x_{\min}) - \log(x_{\min})$ ]

| Variable                       | Median Test |       | T-test |        |
|--------------------------------|-------------|-------|--------|--------|
|                                | $\chi^2$    | P     | T      | P      |
| $\Sigma$ Family A              | 5.00        | 0.025 | -15.35 | <0.001 |
| $\Sigma$ Family B              | 5.00        | 0.025 | -8.29  | <0.001 |
| Family A1-6                    | 5.00        | 0.025 | -14.76 | <0.001 |
| A-1                            | 7.50        | 0.006 | -28.30 | <0.001 |
| A-2                            | 5.00        | 0.025 | -14.78 | <0.001 |
| A-3                            | 11.67       | 0.001 | -30.79 | <0.001 |
| A-4                            | 7.50        | 0.006 | -20.85 | <0.001 |
| A-5                            | 11.67       | 0.001 | -37.27 | <0.001 |
| A-6                            | 5.00        | 0.025 | -14.33 | <0.001 |
| A-7                            | 5.00        | 0.025 | -15.53 | <0.001 |
| A-8                            | 5.00        | 0.025 | -14.27 | <0.001 |
| B-1                            | 5.00        | 0.025 | -9.36  | <0.001 |
| B-2                            | 5.00        | 0.025 | -8.20  | <0.001 |
| O <sub>2</sub> :O <sub>4</sub> | 3.96        | 0.047 | -2.96  | 0.016  |

**Table S6.** Family A and B acids, as methyl esters, in OSPW and Background groundwaters sampled in this study. <DL denotes concentrations below detection limit, 0.2 µg/L.

| <b>Family A/B Isomer Concentration (ug/L)</b> |            |            |            |            |            |            |            |            |            |            |
|-----------------------------------------------|------------|------------|------------|------------|------------|------------|------------|------------|------------|------------|
| <b>OSPW</b>                                   | <b>A-1</b> | <b>A-2</b> | <b>A-3</b> | <b>A-4</b> | <b>A-5</b> | <b>A-6</b> | <b>A-7</b> | <b>A-8</b> | <b>B-1</b> | <b>B-2</b> |
| MLSB                                          | 16.7       | 25.0       | 20.2       | 12.4       | 10.3       | 34.6       | 6.5        | 5.2        | 32.9       | 24.5       |
| NVS_2_MLSB_1                                  | 19.6       | 53.7       | 24.5       | 16.7       | 10.0       | 75.1       | 8.9        | 8.8        | 108.3      | 105.9      |
| NVS_2_MLSB_2                                  | 19.0       | 57.1       | 28.2       | 17.6       | 11.8       | 78.1       | 8.7        | 6.7        | 107.9      | 94.1       |
| NVS_2_MLSB_3                                  | 19.6       | 54.7       | 25.3       | 14.6       | 9.4        | 70.4       | 8.3        | 8.9        | 101.1      | 112.6      |
| NVS_2_MSB_4                                   | 18.7       | 52.0       | 23.2       | 14.1       | 14.1       | 66.6       | 7.9        | 8.4        | 98.5       | 101.9      |
| NVS_2_MLSB_4.1                                | 18.5       | 46.9       | 22.3       | 13.3       | 8.3        | 62.4       | 6.3        | 4.6        | 87.3       | 79.4       |
| NVS_2_MLSB_4.2                                | 16.0       | 41.2       | 22.6       | 13.6       | 8.9        | 57.4       | 7.9        | 8.0        | 26.1       | 79.3       |
| NVS_2_MLSB_5                                  | 15.2       | 43.2       | 20.7       | 12.6       | 9.1        | 56.7       | 7.5        | 7.8        | 74.8       | 94.7       |
| NVS_2_MLSB_5.1                                | 16.3       | 44.1       | 22.4       | 5.2        | 9.1        | 57.2       | 7.0        | 8.0        | 87.8       | 72.7       |
| NVS_MLSB_5.2                                  | 9.8        | 18.7       | 8.5        | 5.2        | 4.0        | 16.9       | 3.6        | 0.0        | 43.6       | 35.2       |
| NVS_1_SWIP_1                                  | 23.9       | 76.3       | 33.8       | 24.5       | 11.8       | 108.3      | 17.2       | 18.9       | 129.0      | 105.8      |
| NVS_1_SWIP_2                                  | 26.4       | 74.9       | 33.5       | 21.3       | 14.8       | 99.7       | 15.8       | 16.5       | 95.1       | 159.2      |
| NVS_1_SWIP_3                                  | 23.2       | 80.1       | 39.2       | 26.2       | 17.2       | 114.5      | 17.9       | 19.1       | 117.8      | 132.6      |
| NVS_1_SWIP_4                                  | 26.4       | 79.5       | 36.6       | 24.8       | 15.7       | 111.4      | 18.9       | 18.9       | 120.7      | 109.0      |
| NVS_1_SWIP_4.1                                | 26.1       | 79.9       | 37.0       | 24.9       | 15.3       | 109.3      | 18.1       | 18.8       | 129.2      | 146.7      |
| NVS_1_SWIP_4.2                                | 21.9       | 63.9       | 32.6       | 20.9       | 12.7       | 87.3       | 11.9       | 12.5       | 114.0      | 93.3       |
| NVS_1_SWIP_5                                  | 26.5       | 89.1       | 45.3       | 29.8       | 21.0       | 128.7      | 21.4       | 22.0       | 37.9       | 125.4      |
| NVS_1_SWIP_5.1                                | 23.4       | 79.0       | 37.1       | 24.6       | 18.7       | 117.9      | 19.8       | 20.4       | 126.3      | 116.4      |
| NVS_1_SWIP_5.2                                | 18.0       | 38.2       | 17.8       | 11.1       | 5.1        | 40.9       | 4.6        | 0.0        | 84.8       | 66.3       |
| NVS_3_SWSS_1                                  | 24.2       | 56.0       | 31.3       | 17.8       | 8.9        | 75.7       | 11.1       | 10.5       | 105.1      | 99.9       |
| NVS_3_SWSS_2                                  | 22.9       | 57.2       | 31.6       | 17.7       | 10.8       | 74.8       | 10.5       | 11.2       | 108.7      | 86.3       |
| NVS_3_SWSS_3                                  | 21.7       | 51.0       | 29.0       | 16.8       | 9.3        | 70.1       | 9.7        | 10.2       | 106.7      | 80.5       |
| <b>Background</b>                             |            |            |            |            |            |            |            |            |            |            |
| <b>Groundwater</b>                            | <b>A-1</b> | <b>A-2</b> | <b>A-3</b> | <b>A-4</b> | <b>A-5</b> | <b>A-6</b> | <b>A-7</b> | <b>A-8</b> | <b>B-1</b> | <b>B-2</b> |
| DP 1                                          | <DL        | 2.2        | <DL        | 0.4        | <DL        | 2.0        | 0.4        | 0.4        | 4.9        | 4.9        |
| DP 2                                          | <DL        | <DL        | <DL        | <DL        | <DL        | <DL        | 0.6        | <DL        | 10.1       | 12.8       |
| DP 3                                          | <DL        |
| BG-1                                          | <DL        | 0.1        | <DL        | <DL        |
| BG-2                                          | <DL        | 0.9        | <DL        | 0.3        | <DL        | 0.5        | <DL        | <DL        | 1.4        | 2.9        |
| BG-3                                          | 0.4        | 1.3        | 0.5        | 0.4        | 0.1        | 0.7        | 0.1        | 0.1        | 3.4        | 3.4        |

|       |     |     |     |     |     |     |     |     |     |     |
|-------|-----|-----|-----|-----|-----|-----|-----|-----|-----|-----|
| BG-4  | <DL | 0.2 | <DL | <DL | <DL | 0.1 | 0.1 | <DL | 0.4 | 0.5 |
| BG-5  | <DL |
| BG-6  | <DL | 0.3 | <DL | <DL | <DL | 0.3 | 0.1 | 0.1 | 1.3 | 1.1 |
| BG-7  | <DL | 0.3 | <DL | <DL | <DL | 0.2 | 0.1 | 0.1 | 0.6 | 0.6 |
| BG-8  | <DL | 0.7 | <DL | 0.3 | <DL | 0.6 | 0.1 | 0.1 | 1.2 | 1.6 |
| BG-9  | 0.4 | 0.5 | <DL | <DL | <DL | 3.3 | <DL | <DL | 3.8 | 3.8 |
| BG-10 | 0.2 | 0.2 | <DL | <DL | <DL | 0.7 | 0.2 | 0.2 | 2.6 | 2.3 |
| BG-11 | <DL | 0.3 | <DL | <DL | <DL | 0.3 | <DL | <DL | 1.5 | 1.0 |
| BG-12 | <DL | 0.2 | <DL |
| BG-13 | 0.1 | 0.2 | 0.1 | <DL | 0.1 | 0.3 | 0.1 | 0.1 | 0.5 | 0.7 |

### Unknowns

#### beside TID

|      | A-1 | A-2  | A-3 | A-4 | A-5 | A-6  | A-7 | A-8 | B-1  | B-2  |
|------|-----|------|-----|-----|-----|------|-----|-----|------|------|
| DP-4 | 7.9 | 18.3 | 8.1 | 5.8 | 2.9 | 19.8 | 0.4 | 0.6 | 15.9 | 21.0 |
| DP-5 | 7.1 | 9.7  | 4.2 | 3.5 | 1.4 | 10.4 | 0.2 | 0.2 | 14.1 | 20.1 |
| DP-6 | <DL | <DL  | 1.3 | 0.6 | 0.3 | 3.4  | <DL | <DL | 7.5  | 7.1  |

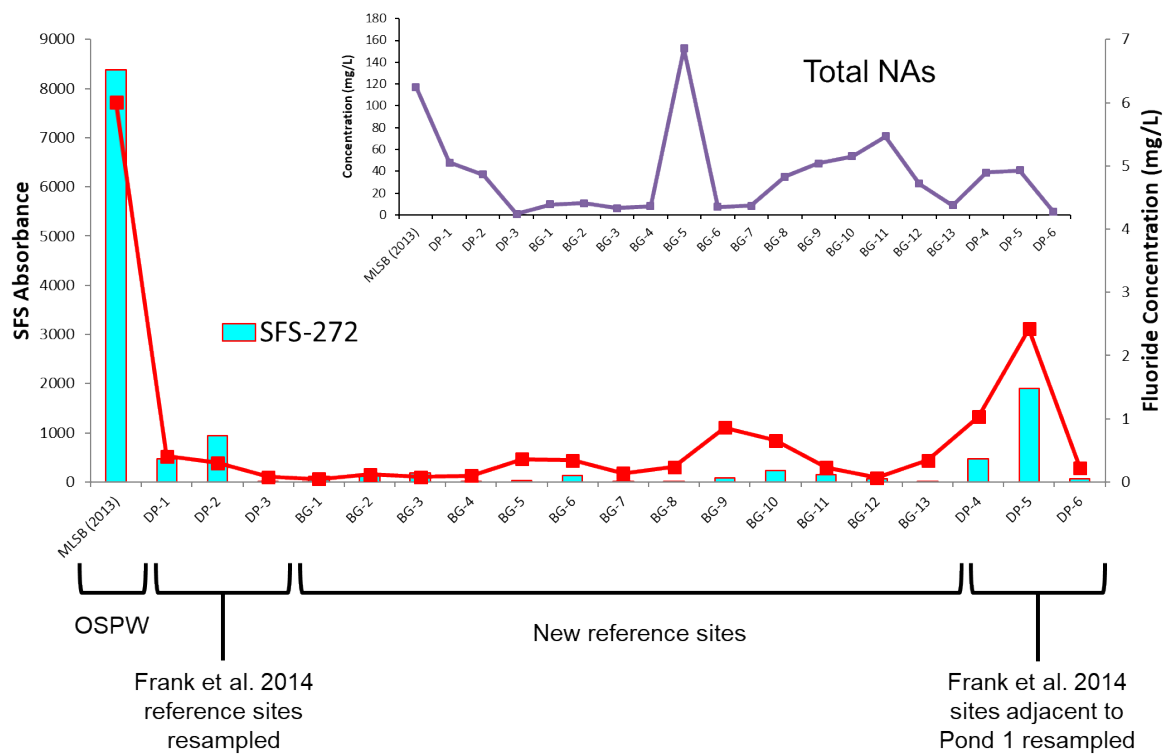

**Figure S4.** Synchronous fluorescence spectroscopy (SFS) absorbances, Fluoride and total Naphthenic Acid concentrations measured in the sample groups investigated.

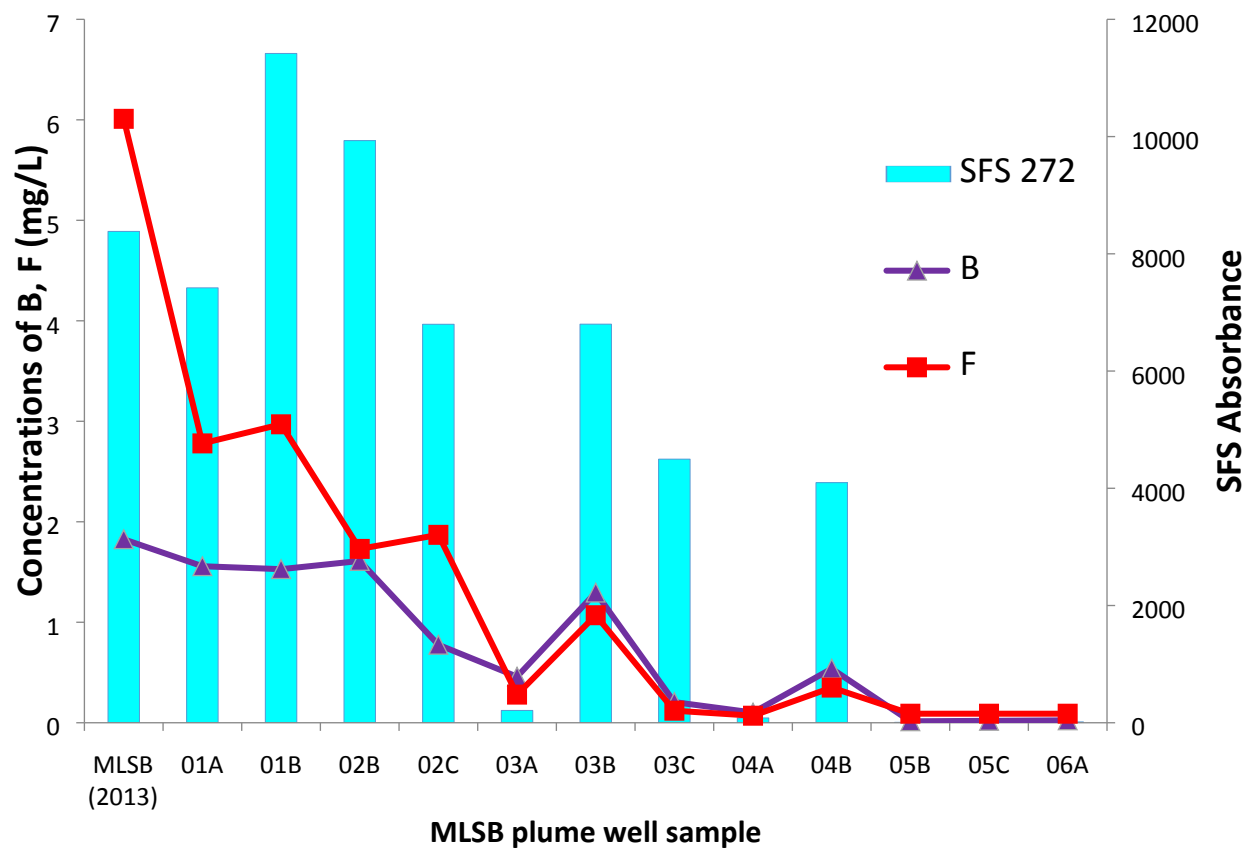

**Figure S5.** Concentrations of Boron and Fluoride, and SFS absorbances determined for well samples of the MLSB plume monitoring network and the OSPW-source MLSB tailings pond.

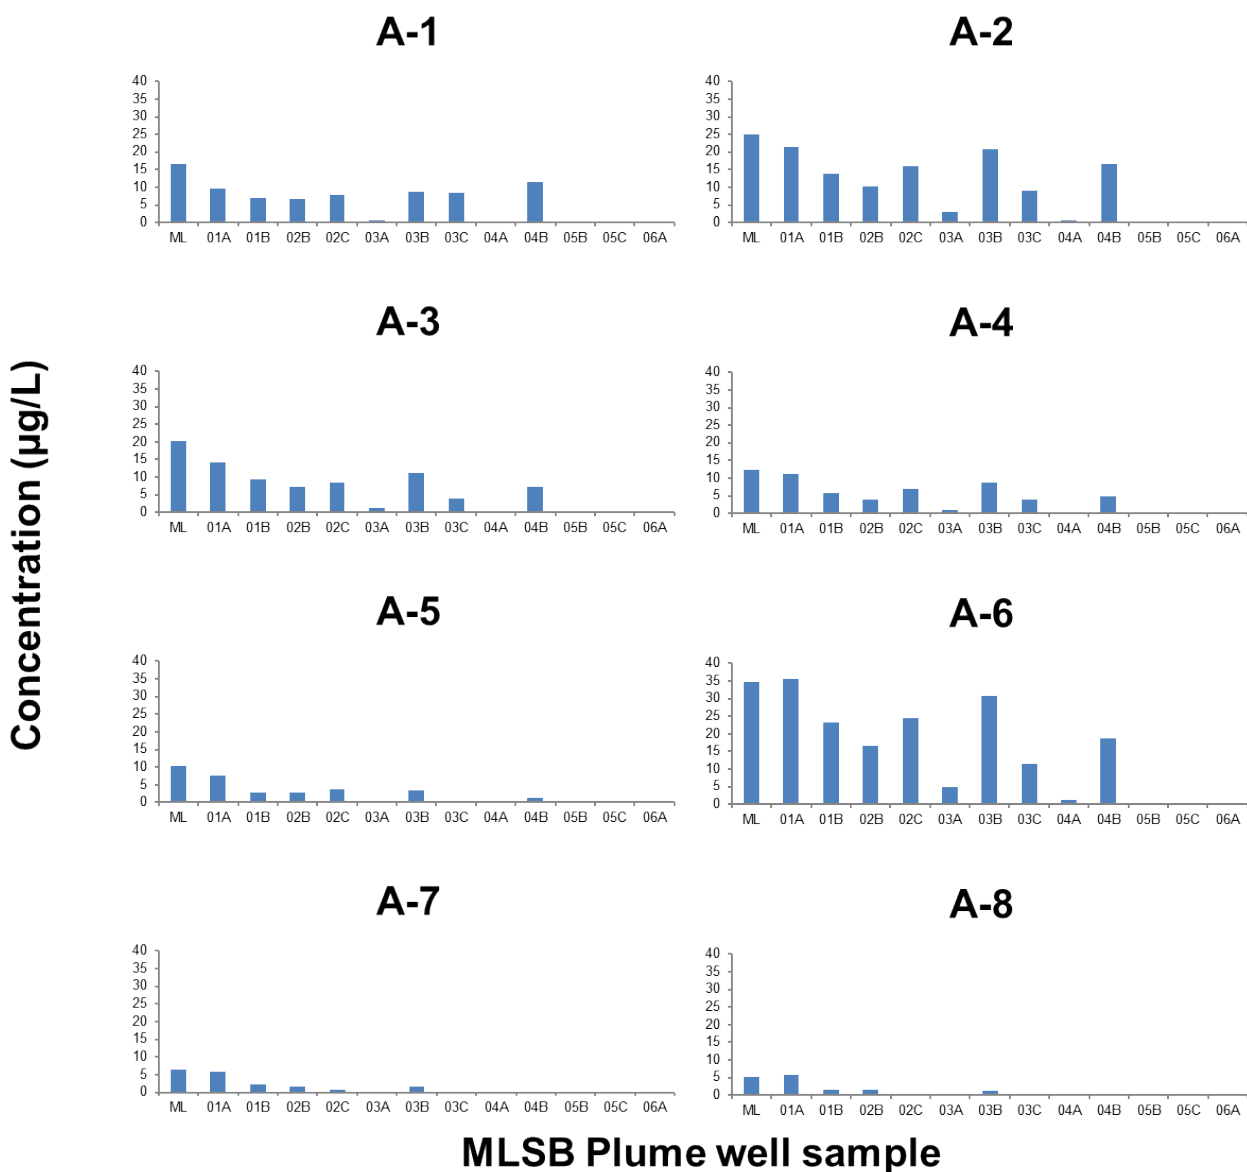

**Figure S6.** Concentrations of Family A isomers detected in MLSB Plume well samples. “ML” designates the OSPW sample from the source pond, (MLS B 2013), collected at the time of well sampling.



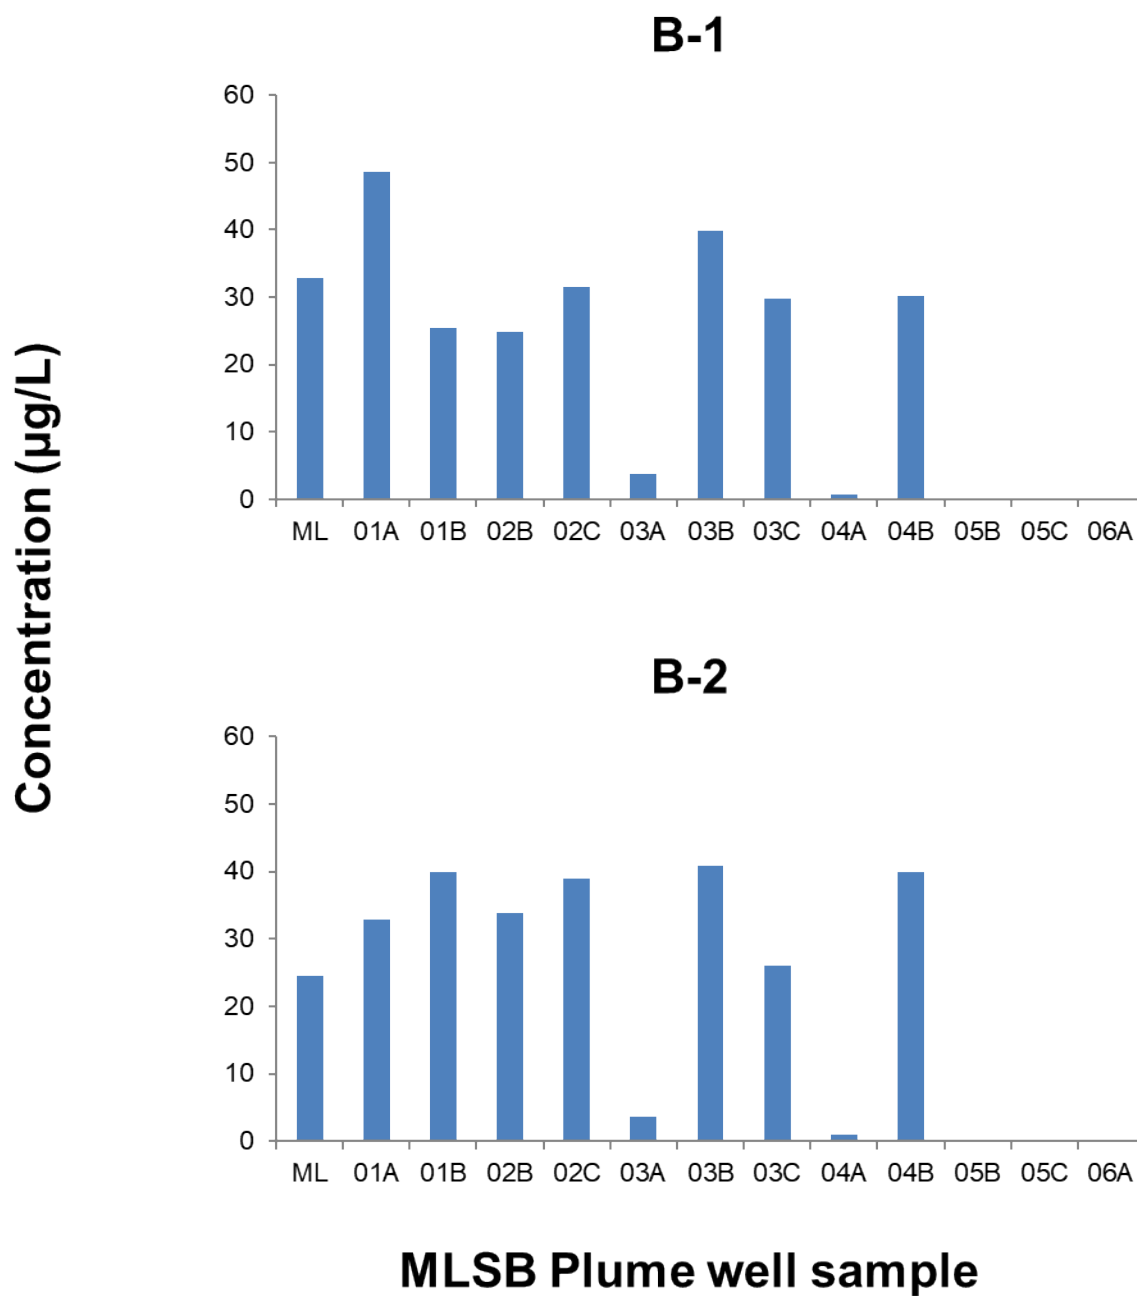

**Figure S7.** Concentrations of Family B isomers detected in MLSB Plume well samples. “ML” designates the OSPW sample from the source pond, MLSB, collected at the time of well sampling.

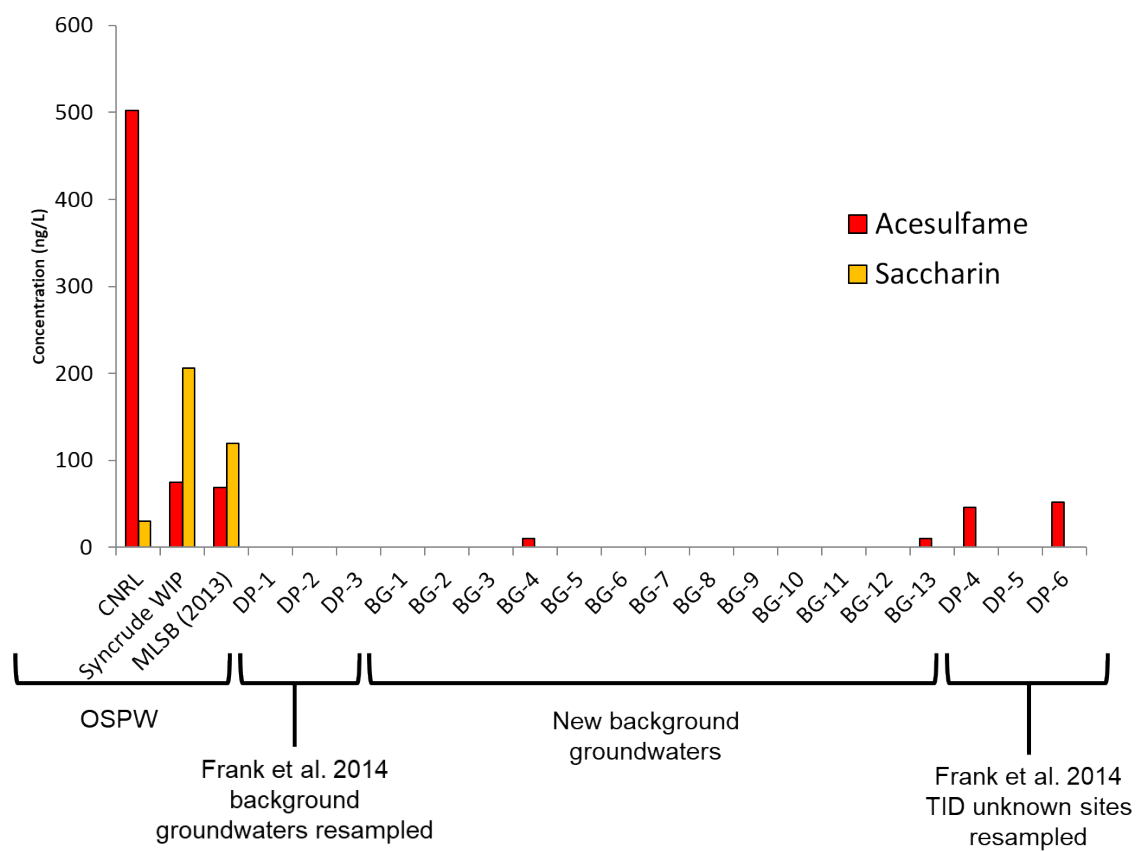

**Figure S8.** Concentrations of artificial sweeteners in the OSPW, background groundwaters and Unknown groundwater samples beside Tar Island Dyke.

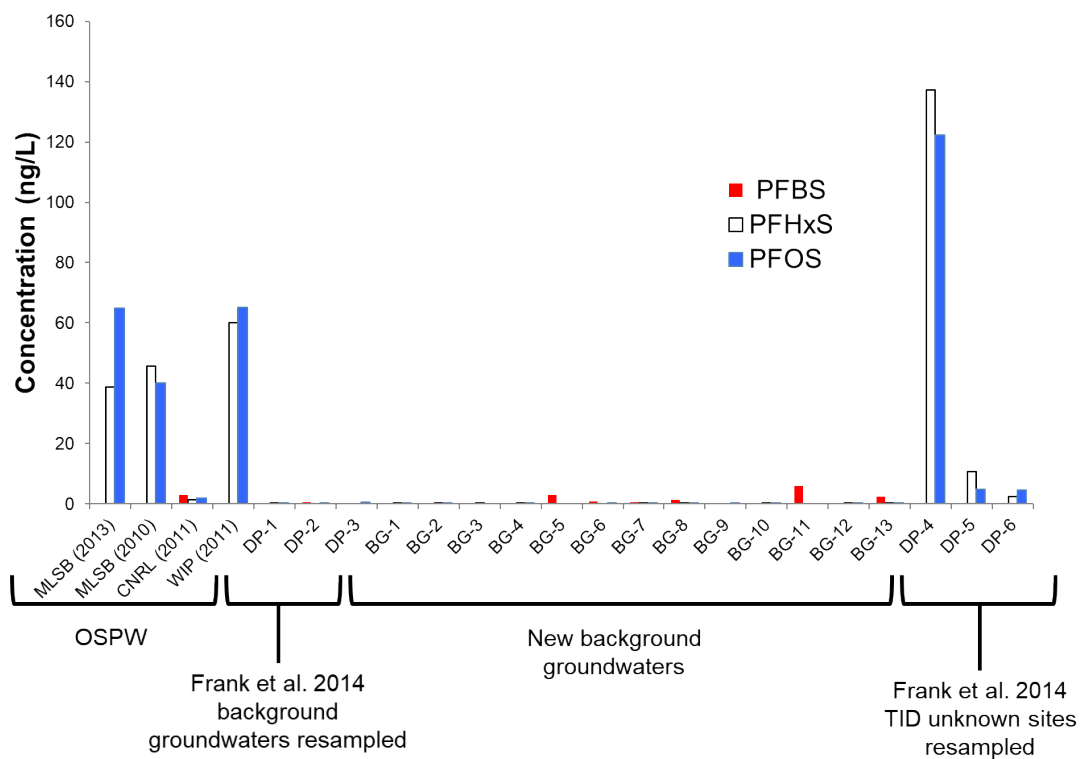

**Figure S9.** Concentrations of PFAS compound classes in OSPW, background groundwaters and Unknown groundwater samples beside Tar Island Dyke.

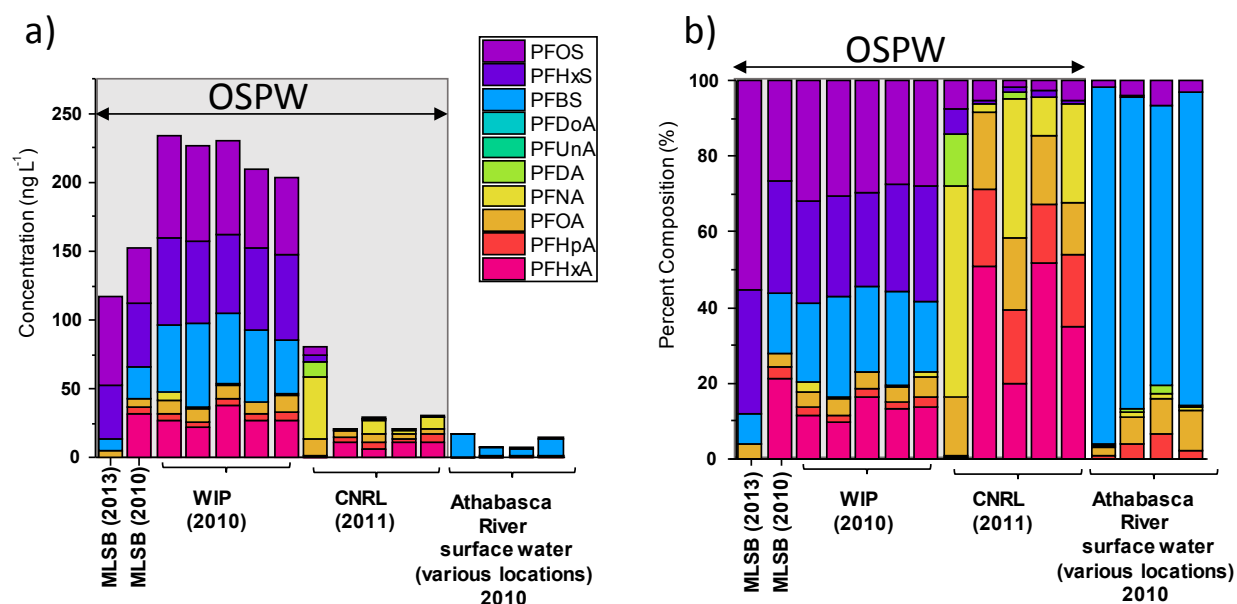

**Figure S10.** Congener-specific PFAS in Oil Sands Process Water compared to surface waters in the Athabasca River expressed as a) concentration and b) composition. Athabasca River water samples were collected in late March 2010 at four sites ranging from 55° 5' 25.10 "N, 112° 52' 53.80" W to 57° 25' 29.40 "N, 111° 38' 41.20"W. Legend applies to both panels.

**Table S7.** Pearson correlation matrix for the sums of the Family A and B acids, as methyl esters, expressed relative to the MLSB OSPW sample in the MLSB plume wells. Other metrics included from Figure 4 were as concentration values. Pearson correlations. n=13. r-values are above the diagonal; p-values are below the diagonal.

|               | MLSB/<br>Family A | MLSB/<br>Family B | Chloride | Sodium | Total NA | Acesulfame | Saccharin | Total PFBS | Total PFHxS | Total<br>PFOS |
|---------------|-------------------|-------------------|----------|--------|----------|------------|-----------|------------|-------------|---------------|
| MLSB/Family A | 1                 | 0.860             | 0.840    | 0.923  | 0.792    | 0.221      | 0.826     | 0.237      | 0.811       | 0.868         |
| MLSB/Family B | <0.001            | 1                 | 0.712    | 0.908  | 0.934    | -0.177     | 0.544     | 0.393      | 0.954       | 0.963         |
| Chloride      | <0.001            | 0.006             | 1        | 0.851  | 0.730    | 0.299      | 0.778     | 0.128      | 0.771       | 0.730         |
| Sodium        | <0.001            | <0.001            | <0.001   | 1      | 0.935    | 0.061      | 0.744     | 0.196      | 0.940       | 0.927         |
| Total NA      | 0.001             | <0.001            | <0.001   | <0.001 | 1        | -0.210     | 0.570     | 0.244      | 0.985       | 0.954         |
| Acesulfame    | 0.468             | 0.562             | 0.321    | 0.844  | 0.490    | 1          | 0.595     | -0.201     | -0.153      | -0.103        |
| Saccharin     | <0.001            | 0.055             | 0.002    | 0.004  | 0.042    | 0.032      | 1         | 0.004      | 0.594       | 0.615         |
| Total PFBS    | 0.436             | 0.184             | 0.676    | 0.522  | 0.422    | 0.510      | 0.990     | 1          | 0.264       | 0.413         |
| Total PFHxS   | 0.001             | <0.001            | 0.002    | <0.001 | <0.001   | 0.617      | 0.320     | 0.383      | 1           | 0.945         |
| Total PFOS    | <0.001            | <0.001            | 0.005    | <0.001 | <0.001   | 0.737      | 0.025     | 0.161      | <0.001      | 1             |
